# Supplementary material for: IGF2BP3 and miR191-5p synergistically increase HCC cell invasiveness by altering ZO-1 expression
Source: PubMed Central journal article supplement — Oncol Lett. 2020 May 30;20(2):1423–31. doi: 10.3892/ol.2020.11693 (PMC7377053; doi:10.3892/ol.2020.11693), 2020-05-30

Figure S1. (A) Western blot analysis was performed to detect IGF2BP3 expression following the IGF2BP3 knockdown with shIGF2BP3#2. (B) Transwell assays were performed to assess cellular invasiveness in pLKO (NC) vs. shIGF2BP3#2. (C) Western blot analysis of IGF2BP3 overexpression in Huh-7 cells. (D) Transwell invasion assays were performed using Huh-7 cells transfected with pWPI (NC) and IGF2BP3-cDNA. (E) ZO-1 expression after Huh-7 cells were transfected with oeZO-1 virus. ns, not significant; IGF2BP3, insulin-like growth factor II mRNA-binding protein 3; ZO-1, zonula occludens-1; sh, short hairpin (RNA); oe, overexpression; NC, negative control.

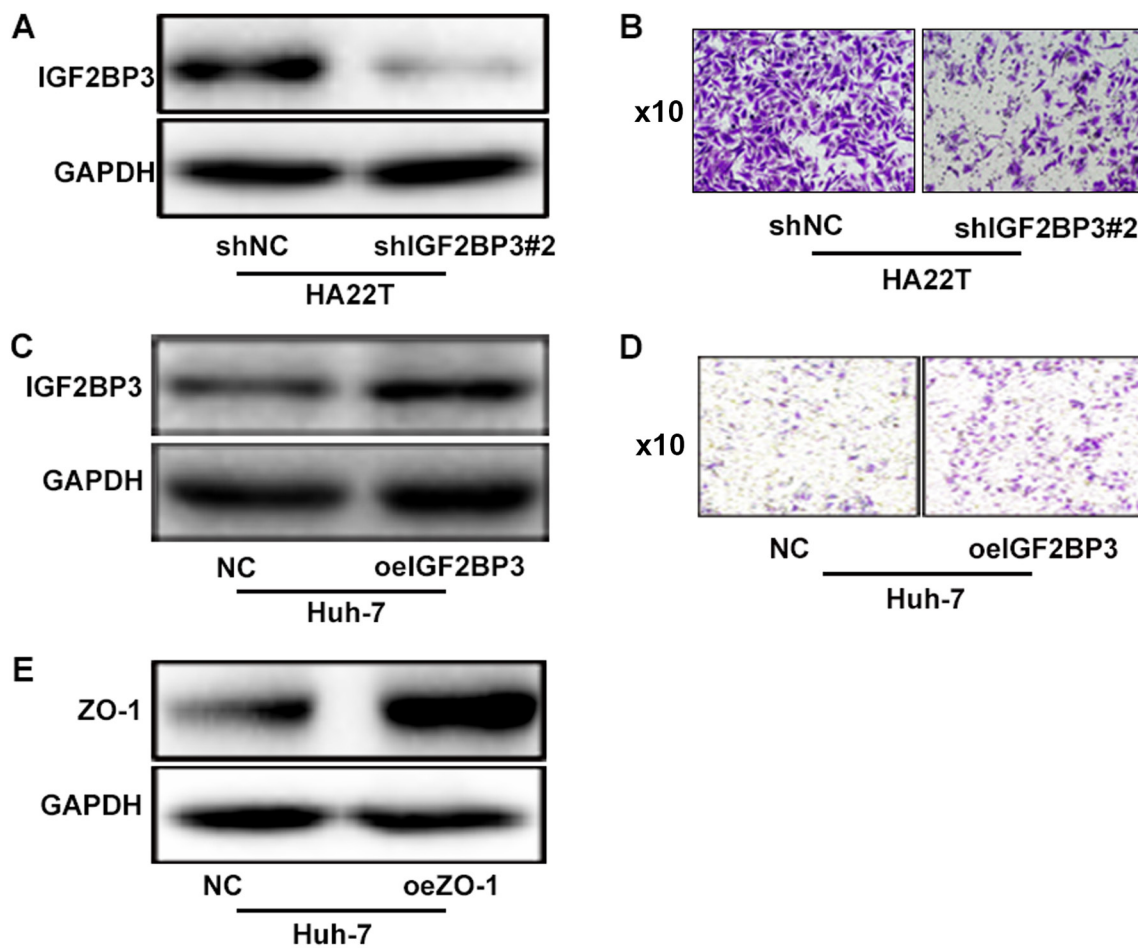

Figure S2. (A) RT-qPCR was conducted to confirm the overexpression of miR191-5p in HA22T cells. (B) Western blotting was performed to detect ZO-1 expression in HA22T cells transfected with/without oemiR191-5p. (C) RT-qPCR was conducted to confirm the overexpression of miR429 in HA22T cells. (D) Western blotting was performed to detect ZO-1 expression in HA22T cells transfected with/without oemiR429. (E) RT-qPCR was conducted to confirm the miR191-5p expression in Huh-7 cells after with/without miR191-5p inhibitor treatment; RT-qPCR, reverse transcription-quantitative PCR; miR, microRNA; sh, short hairpin (RNA); ZO-1, zonula occludens-1; oe, overexpression; NC, negative control. \*\* $P \leq 0.01$

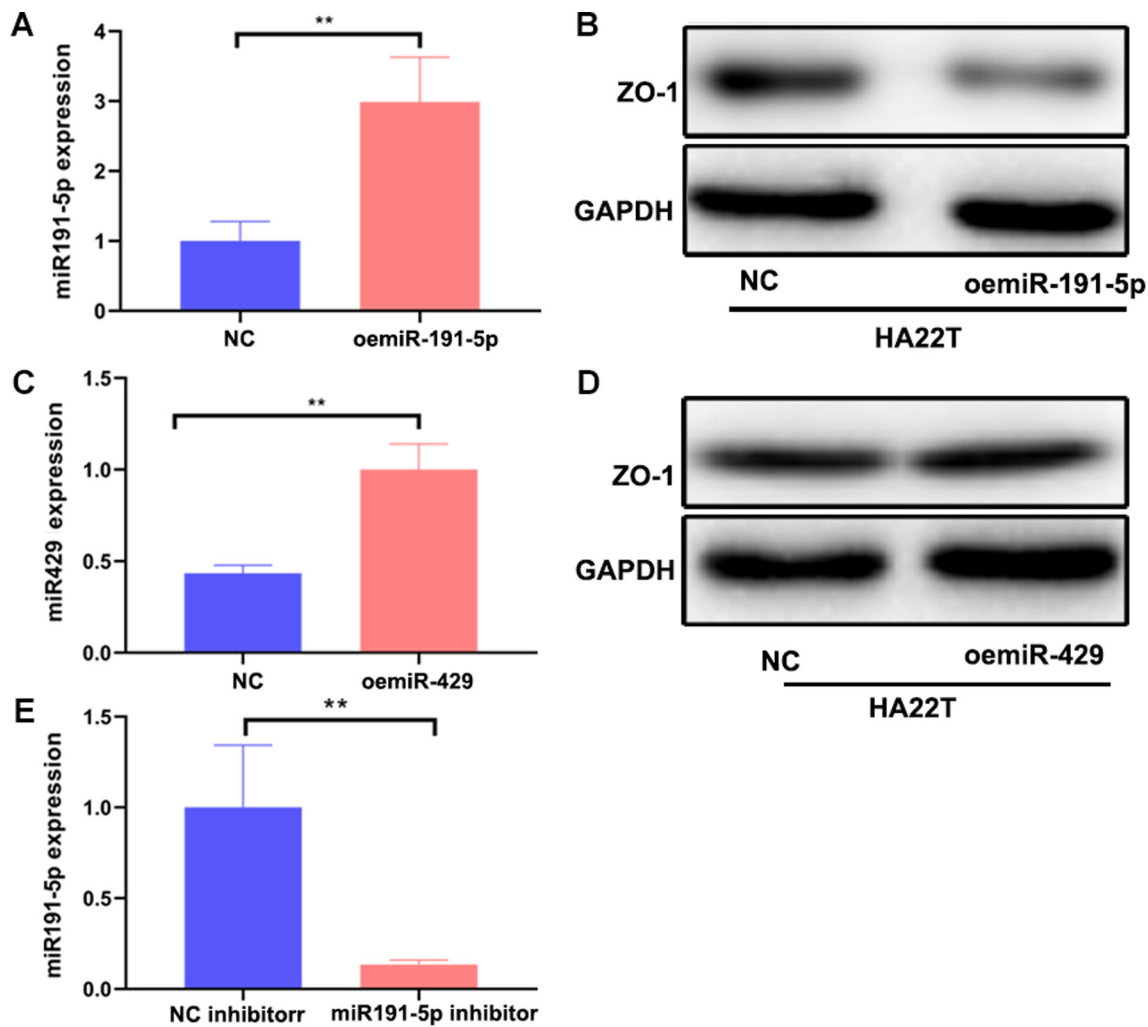

Supplement: Supplementary_Data.pdf [file Supplementary_Data.pdf]
